# Supplementary material for: Controlling Ca2+-Activated K+ Channels with Models of Ca2+ Buffering in Purkinje Cells
Source: Springer Nature journal article supplement (doi:10.1007/s12311-010-0224-3), 2010-10-27
Supplement: MOESM1 [file 25639332]

## **Supplementary Material**

### **Controlling Ca<sup>2+</sup>-activated K<sup>+</sup> channels with models of Ca<sup>2+</sup> buffering in Purkinje cells**

Haroon Anwar<sup>1,2</sup>, Sungho Hong<sup>1</sup>, Erik De Schutter<sup>1,2</sup>

<sup>1</sup> Computational Neuroscience Unit, Okinawa Institute of Science and Technology, Okinawa 904-0411, Japan

<sup>2</sup> Theoretical Neurobiology, University of Antwerp, B-2610 Antwerpen, Belgium.

Corresponding author:

Haroon Anwar

Email: [anwar@oist.jp](mailto:anwar@oist.jp)

Phone: +81-98-966-8714

Fax: +81-98-966-8718

August 27, 2010

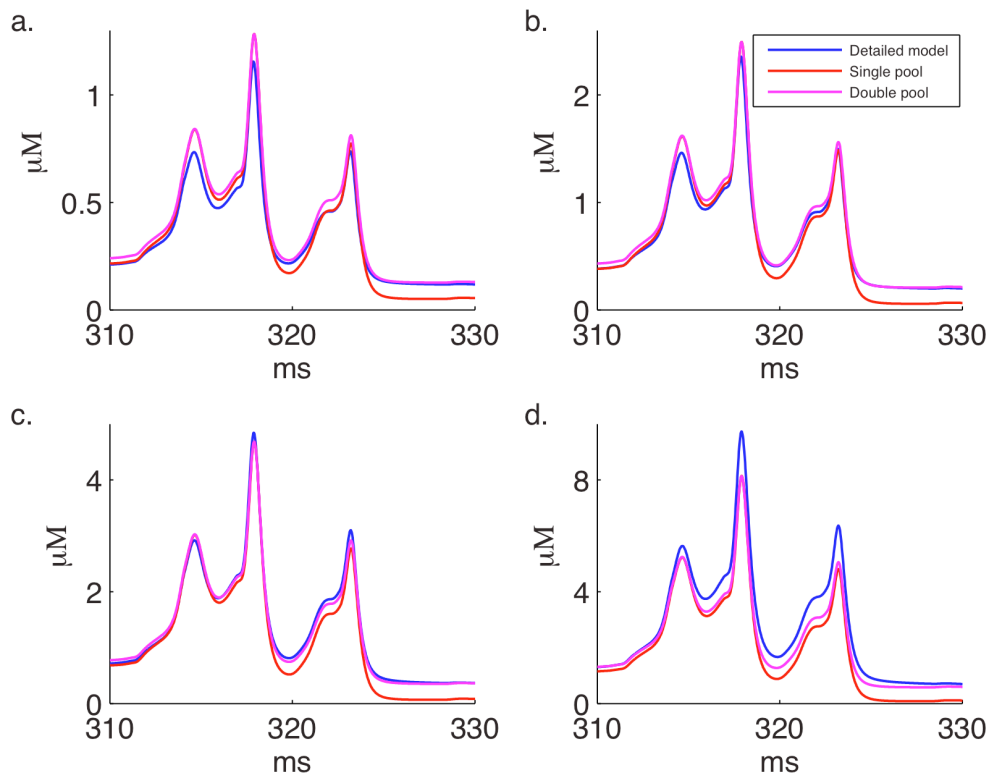

**Supplementary Figure 1:** Comparison of  $\text{Ca}^{2+}$  profiles generated with an experimental voltage protocol using single pool, double pool (parameters specified in the text) and detailed dynamics model. Different peak amplitudes of  $\text{Ca}^{2+}$  a) 1.25  $\mu\text{M}$ , b) 2.5  $\mu\text{M}$ , c) 5  $\mu\text{M}$ , d) 10  $\mu\text{M}$  are simulated to demonstrate the problems the single pool or double pool models have in capturing the complex dynamics of the detailed model. See main text for parameters of the pool models.

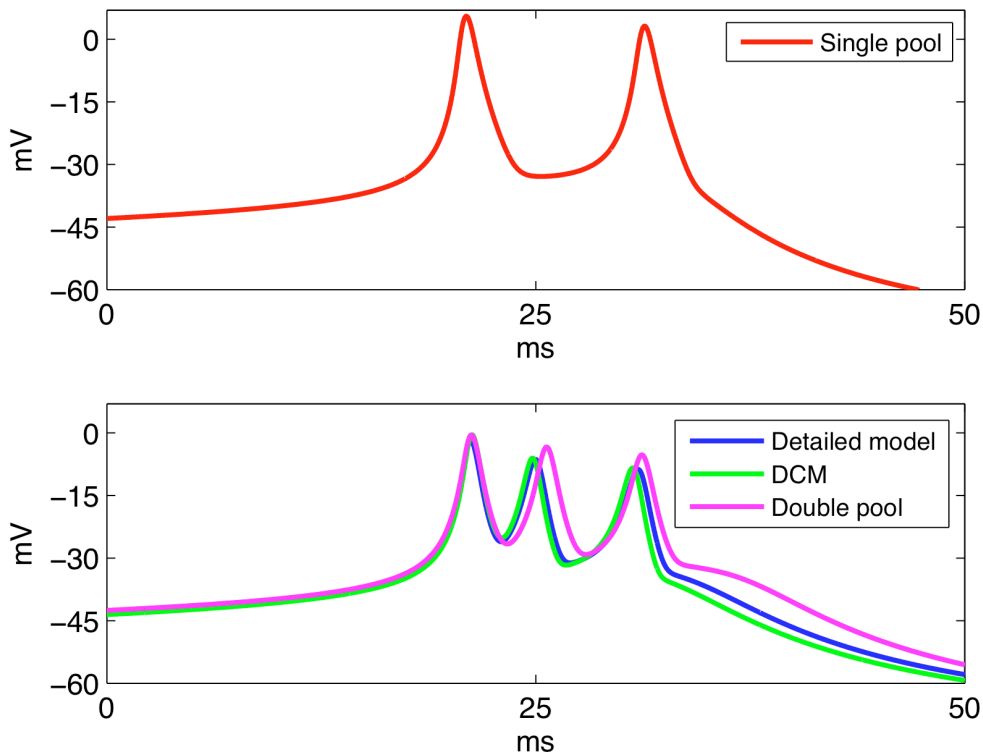

**Supplementary Figure 2:** Dendritic  $\text{Ca}^{2+}$  spikes generated using different  $\text{Ca}^{2+}$  buffering models (aligned at the peak of first spikelet). The parameters used for the pool based models are different from those used in Figure 7, they are the same as in Figure 3. Note that for these parameters the single pool could not produce a triplet of  $\text{Ca}^{2+}$  spikes. The conductance values used to generate the spikes using detailed model and DCM model are listed in Table 2. (Single pool model conductances:  $P_{\max}(\text{CaP}) = 1.97 \times 10^{-4} \text{ cm/s}$ ,  $P_{\max}(\text{CaT}) = 7.65 \times 10^{-6} \text{ cm/s}$ ,  $G_{\max}(\text{BK}) = 6.17 \times 10^{-2} \text{ S/cm}^2$ ,  $G_{\max}(\text{SK}) = 4.72 \times 10^{-4} \text{ S/cm}^2$ ; double pool model conductances:  $P_{\max}(\text{CaP}) = 1.85 \times 10^{-4} \text{ cm/s}$ ,  $P_{\max}(\text{CaT}) = 8.16 \times 10^{-6} \text{ cm/s}$ ,  $G_{\max}(\text{BK}) = 7.02 \times 10^{-2} \text{ S/cm}^2$ ,  $G_{\max}(\text{SK}) = 3.26 \times 10^{-4} \text{ S/cm}^2$ ).

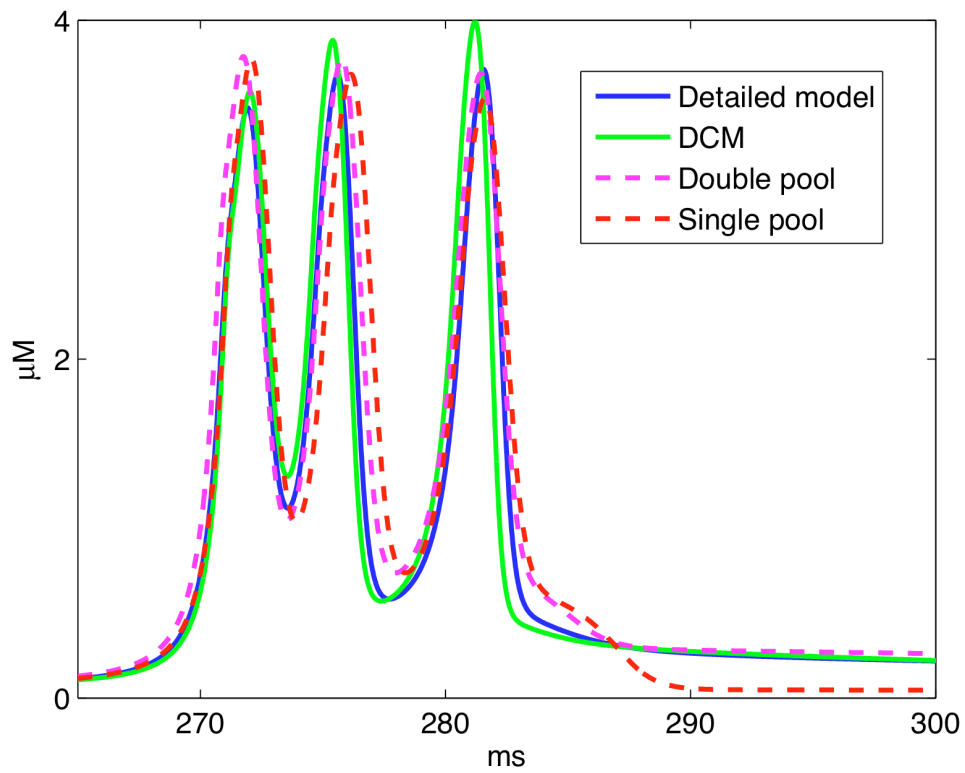

**Supplementary Figure 3:** Comparison of intracellular  $\text{Ca}^{2+}$  profiles generated during the simulation of dendritic  $\text{Ca}^{2+}$  spikes (shown in Figure 7a) using the four different calcium dynamics models.

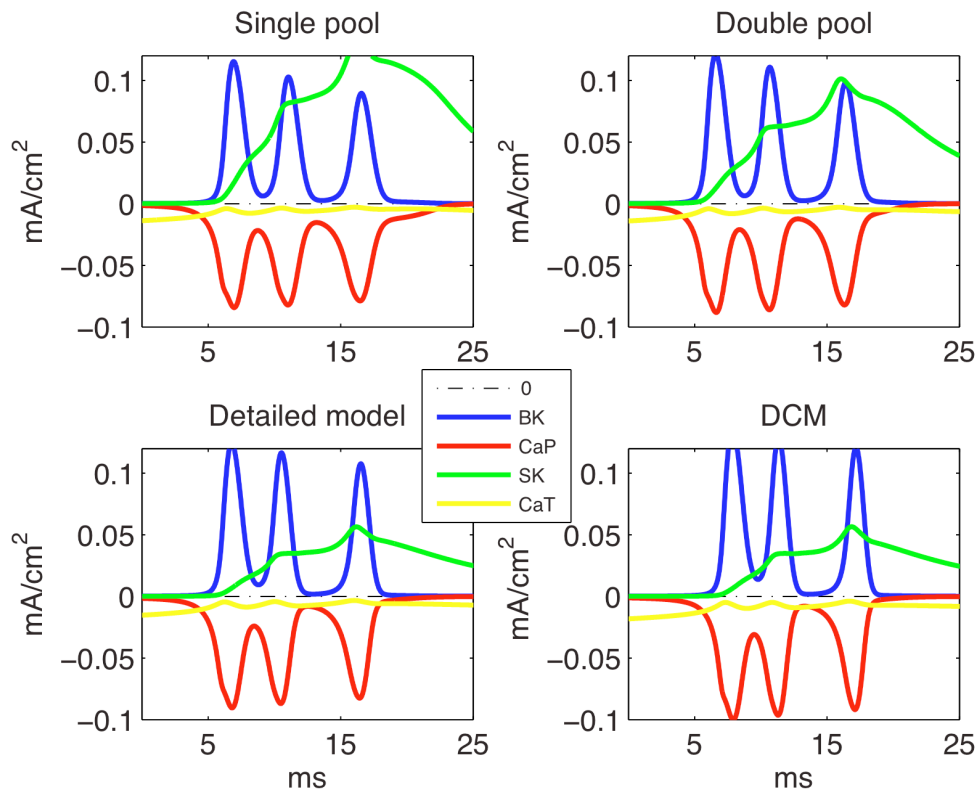

**Supplementary Figure 4:** Currents underlying the generation of dendritic Ca<sup>2+</sup> spikes (shown in Figure 7a) using the four different calcium dynamics models: P-type Ca<sup>2+</sup> current (red), T-type Ca<sup>2+</sup> current (yellow), BK-type K<sub>Ca</sub> current (blue) and SK-type K<sub>Ca</sub> current (green). Note that T-type and SK-type currents shown in the figure are scaled up 100 times and 10 times respectively for demonstration.

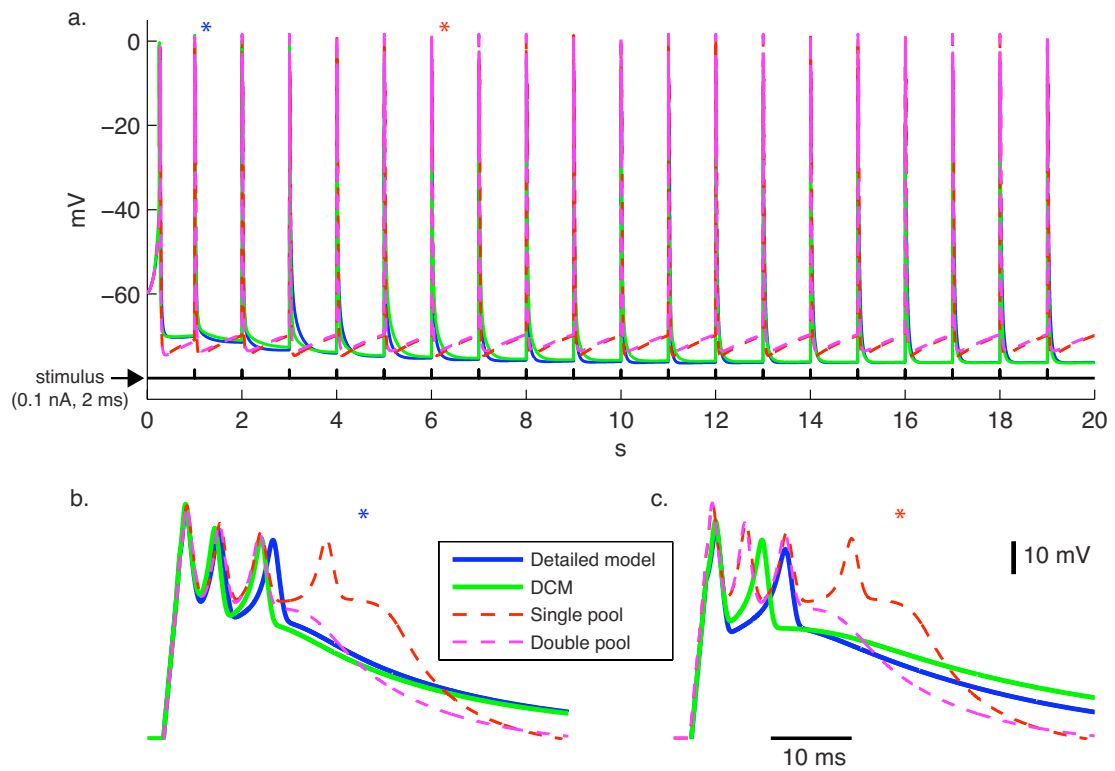

**Supplementary Figure 5:** Dendritic  $\text{Ca}^{2+}$  spikes generated using different buffering models by applying repeated current pulses with amplitude of 0.1 nA for 2 ms at 1 Hz. a) stimulated  $\text{Ca}^{2+}$  spike bursting over 20 s: blue asterisk indicates the burst after first stimulation (shown in b), red asterisk indicates the burst after sixth stimulation (shown in c), b) first stimulated burst of  $\text{Ca}^{2+}$  spikes, c) sixth stimulated burst of  $\text{Ca}^{2+}$  spikes.

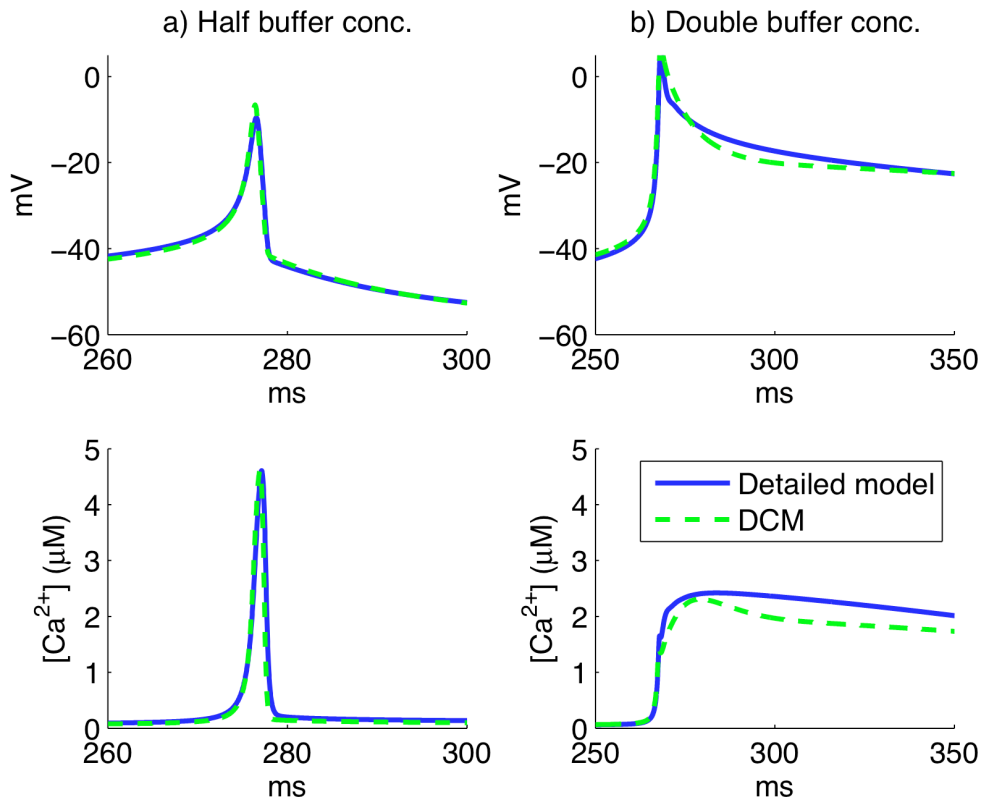

**Supplementary Figure 6:** Robustness of DCM. a) Reducing the concentrations of buffers to half of their concentration in the detailed model resulted in a changed  $\text{Ca}^{2+}$  spike. Same changes in concentration of buffers in DCM model reproduced the  $\text{Ca}^{2+}$  spike perfectly. (DCM model conductances:  $P_{\max}(\text{CaP}) = 2.36 \times 10^{-4} \text{ cm/s}$ ,  $P_{\max}(\text{CaT}) = 8.35 \times 10^{-6} \text{ cm/s}$ ,  $G_{\max}(\text{BK}) = 7.94 \times 10^{-2} \text{ S/cm}^2$ ,  $G_{\max}(\text{SK}) = 4.6 \times 10^{-4} \text{ S/cm}^2$ ), b) Increasing the concentrations of buffers to double of their concentration in the detailed model resulted in a prolonged  $\text{Ca}^{2+}$  spike. Same changes in concentration of buffers in DCM model approximated this prolonged  $\text{Ca}^{2+}$  spike. (DCM model conductances:  $P_{\max}(\text{CaP}) = 1.62 \times 10^{-4} \text{ cm/s}$ ,  $P_{\max}(\text{CaT}) = 7.85 \times 10^{-6} \text{ cm/s}$ ,  $G_{\max}(\text{BK}) = 6.19 \times 10^{-2} \text{ S/cm}^2$ ,  $G_{\max}(\text{SK}) = 4 \times 10^{-4} \text{ S/cm}^2$ ).
